# Supplementary material for: Effectively incorporating selected multimedia content into medical publications
Source: PubMed Central journal article supplement (PMC3040697; doi:10.1186/1741-7015-9-17), 2011-02-17

**Click  
for 3D**

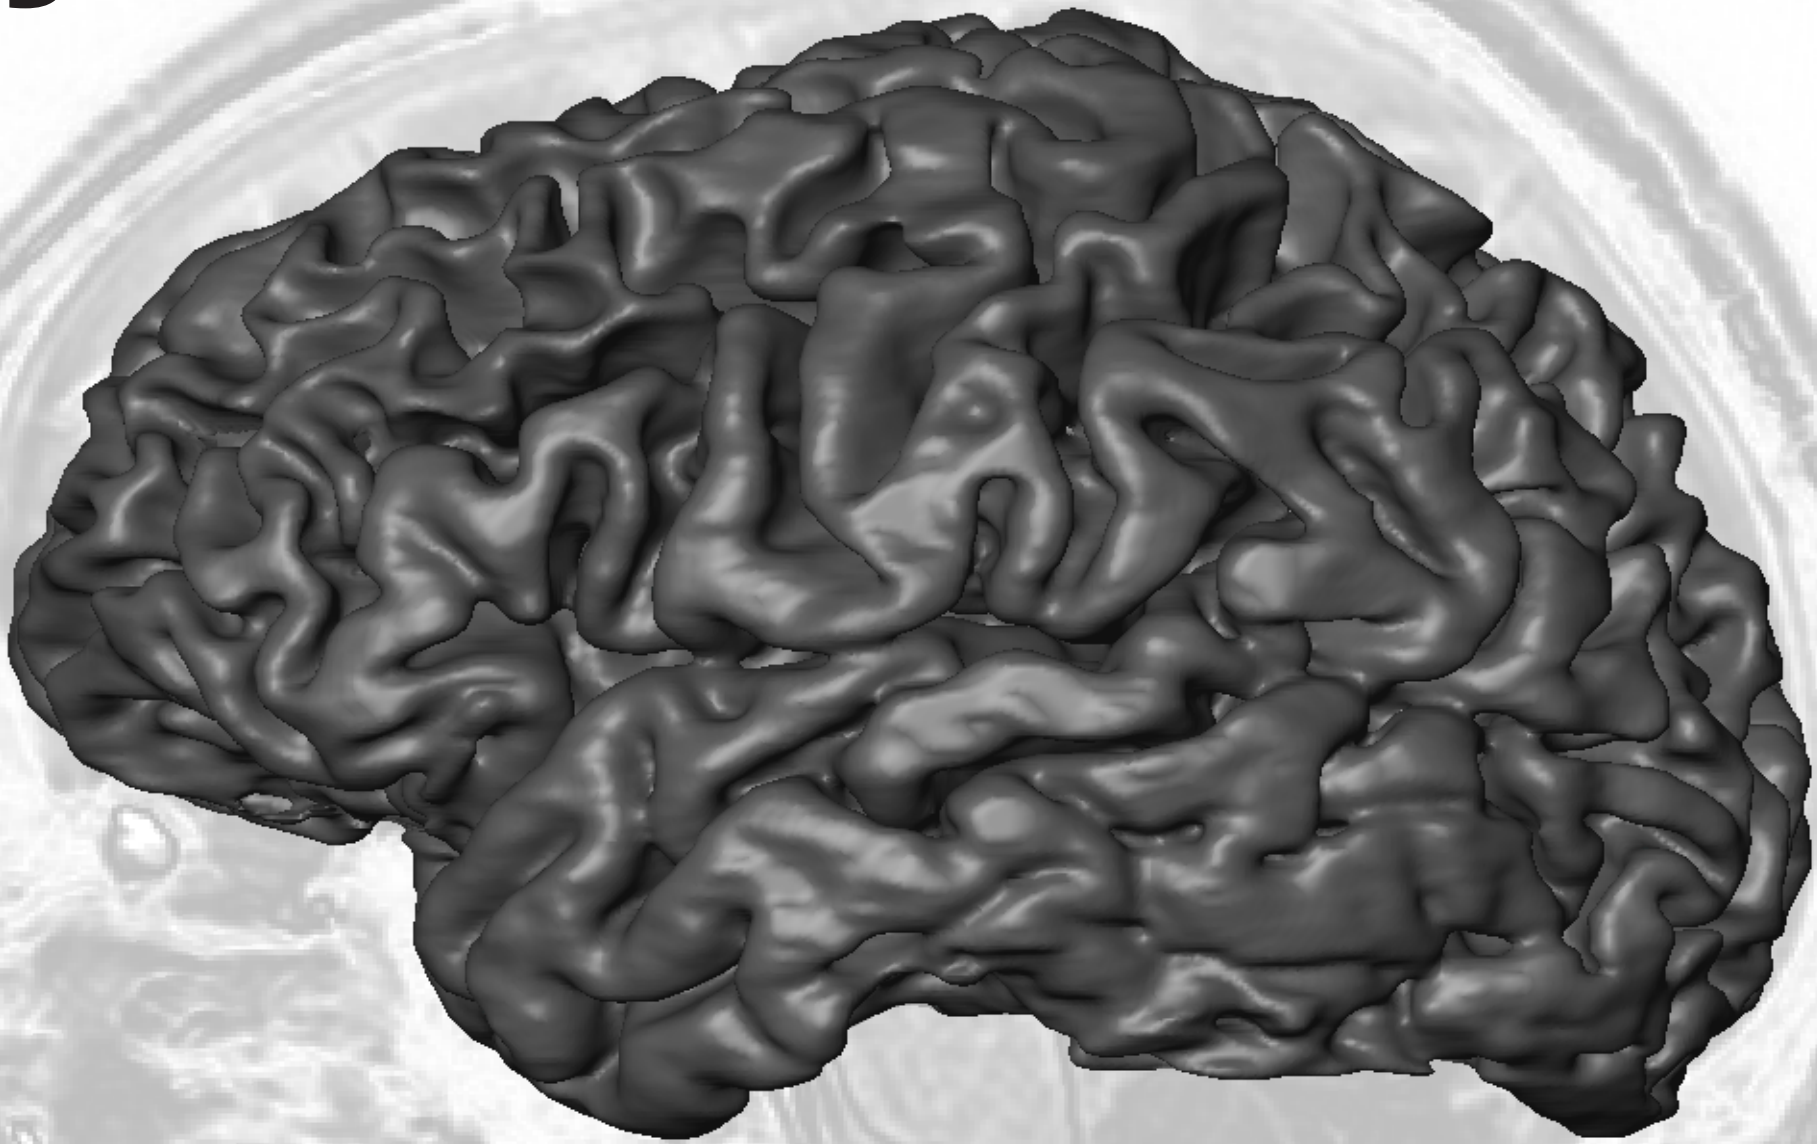

Supplement: 1741-7015-9-17-S2.pdf [file 1741-7015-9-17-S2.pdf]
