# Supplementary material for: Effectively incorporating selected multimedia content into medical publications
Source: PubMed Central journal article supplement (PMC3040697; doi:10.1186/1741-7015-9-17), 2011-02-17

BF 22Hz  
15cm

**2D**  
75%  
K 50  
M Niedrig  
HAllg

**FD**  
66%  
2.5MHz  
WF Hoch  
Mittel

S3 S4  
+61.6  
-61.6  
cm/s

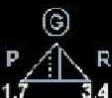

**Click  
for Video**

JPEG

64 /min

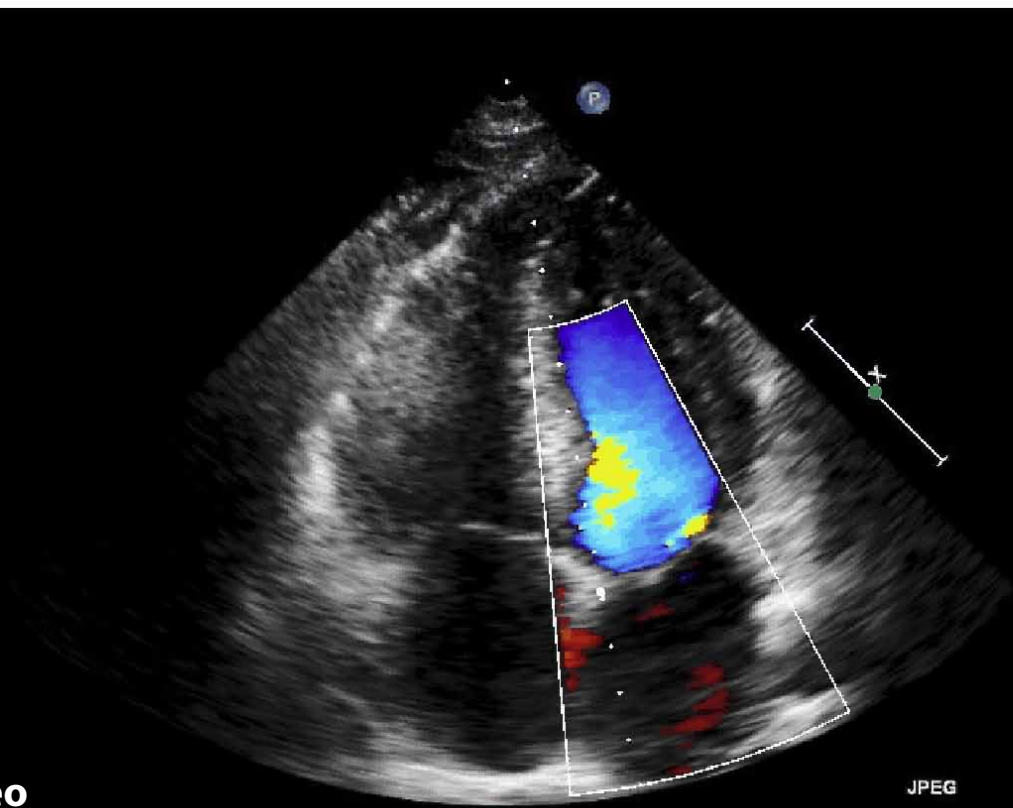

Supplement: 1741-7015-9-17-S3.pdf [file 1741-7015-9-17-S3.pdf]
